# Supplementary material for: An antimony(iii) borate with large birefringence exhibiting unwonted [B5O11] fundamental building blocks and dimeric [Sb2O6] clusters
Source: Royal Society of Chemistry journal article supplement (doi:10.1039/d1qi00201e), 2021-01-01
Supplement: d1qi00201e1.pdf [file d1qi00201e1.pdf]

*Electronic Supplementary Information*

**An Antimony (III) Borate with Large Birefringence Exhibiting  
Unwonted [B<sub>5</sub>O<sub>11</sub>] Fundamental Building Block and Dimeric  
[Sb<sub>2</sub>O<sub>6</sub>] Cluster**

Zhen Chen,<sup>a,b,#</sup> Hao Zeng,<sup>a,#</sup> Shujuan Han,<sup>a,b\*</sup> Zhihua Yang,<sup>a,b</sup> and Shilie Pan<sup>a,b\*</sup>

<sup>a</sup>CAS Key Laboratory of Functional Materials and Devices for Special Environments,  
Xinjiang Technical Institute of Physics & Chemistry, CAS; Xinjiang Key Laboratory  
of Electronic Information Materials and Devices, 40 - 1 South Beijing Road, Urumqi  
830011, China.

<sup>b</sup>Center of Materials Science and Optoelectronics Engineering, University of Chinese  
Academy of Sciences, Beijing 100049, China.

<sup>#</sup>These authors contributed equally to this work.

\*Corresponding author, E-mail: [slpan@ms.xjb.ac.cn](mailto:slpan@ms.xjb.ac.cn)

**Table S1.** Crystal data and structure refinement for SbB<sub>5</sub>O<sub>9</sub>.

| Empirical formula                                           | SbB <sub>5</sub> O <sub>9</sub>                                           |
|-------------------------------------------------------------|---------------------------------------------------------------------------|
| Temperature                                                 | 296.15 K                                                                  |
| Crystal system, space group                                 | Monoclinic, $P2_1/c$                                                      |
| Unit cell dimensions (Å)                                    | $a = 4.3535(4)$<br>$b = 26.18(2)$ $\beta = 113.526(5)$<br>$c = 6.6465(6)$ |
| Volume (Å <sup>3</sup> )                                    | 694.57(11)                                                                |
| Z, Calculated density (g/cm <sup>3</sup> )                  | 4, 3.058                                                                  |
| Absorption coefficient(mm <sup>-1</sup> )                   | 4.000                                                                     |
| $F(000)$                                                    | 592                                                                       |
| Theta range for data collection(°)                          | 3.113 - 25.242                                                            |
| Limiting indices                                            | $-5 \leq h \leq 5$ , $-31 \leq k \leq 34$ , $-8 \leq l \leq 8$            |
| Reflections collected / unique                              | 8877 / 1597 [ $R(\text{int}) = 0.0556$ ]                                  |
| Completeness to theta                                       | 99.90%                                                                    |
| Goodness-of-fit on $F^2$                                    | 1.110                                                                     |
| Final $R$ indices [ $F_o^2 > 2\sigma(F_c^2)$ ] <sup>a</sup> | $R_1 = 0.0244$ , $wR_2 = 0.0495$                                          |
| $R$ indices (all data) <sup>a</sup>                         | $R_1 = 0.0319$ , $wR_2 = 0.0513$                                          |
| Largest diff. peak and hole (e·Å <sup>-3</sup> )            | 0.553 and - 0.733                                                         |

<sup>a</sup> $R_1 = \Sigma||F_o| - |F_c||/\Sigma|F_o|$  and  $wR_2 = [\Sigma w(F_o^2 - F_c^2)^2/\Sigma wF_o^4]^{1/2}$  for  $F_o^2 > 2\sigma(F_o^2)$ .

**Table S2.** Atomic coordinates ( $\times 10^4$ ), equivalent isotropic displacement parameters ( $\text{\AA}^2 \times 10^3$ ) and bond valence sum (BVS) calculations for  $\text{SbB}_5\text{O}_9$ .  $U(\text{eq})$  is defined as one third of the trace of the orthogonalized  $U_{ij}$  tensor.

| Atoms | x        | y        | z        | $U(\text{eq})$ | BVS  |
|-------|----------|----------|----------|----------------|------|
| Sb(1) | -1867(1) | -559(1)  | 13937(1) | 8(1)           | 2.83 |
| B(1)  | 854(11)  | -564(2)  | 10315(7) | 8(1)           | 3.04 |
| B(2)  | 4533(10) | -577(2)  | 8146(6)  | 9(1)           | 3.07 |
| B(3)  | 4668(12) | -1530(2) | 7579(7)  | 12(1)          | 3.04 |
| B(4)  | 9185(12) | -2086(2) | 9577(8)  | 16(1)          | 3.06 |
| B(5)  | 4098(12) | -2430(2) | 6998(8)  | 15(1)          | 3.07 |
| O(1)  | 1110(7)  | -634(1)  | 12400(4) | 12(1)          | 2.09 |
| O(2)  | 3970(6)  | -548(1)  | 10179(4) | 9(1)           | 1.99 |
| O(3)  | -1997(6) | -492(1)  | 8523(4)  | 10(1)          | 1.88 |
| O(4)  | 2395(6)  | -209(1)  | 6453(4)  | 8(1)           | 2.21 |
| O(5)  | 3276(7)  | -1069(1) | 7054(4)  | 11(1)          | 1.87 |
| O(6)  | 7862(7)  | -1604(1) | 9116(5)  | 18(1)          | 2.00 |
| O(7)  | 12377(7) | -2141(1) | 11031(5) | 20(1)          | 2.09 |
| O(8)  | 2764(7)  | -1951(1) | 6493(4)  | 18(1)          | 1.95 |
| O(9)  | 7279(7)  | -2499(1) | 8513(5)  | 22(1)          | 2.02 |

**Table S3.** Selected bond lengths (Å) and angles (°) for SbB<sub>5</sub>O<sub>9</sub>.

|                     |           |                  |          |
|---------------------|-----------|------------------|----------|
| Sb(1)-O(1)          | 1.954(2)  | B(2)-O(5)        | 1.472(5) |
| Sb(1)-O(2)#2        | 2.431(2)  | B(3)-O(5)        | 1.333(5) |
| Sb(1)-O(4)#3        | 2.030(2)  | B(3)-O(6)        | 1.372(5) |
| Sb(1)-O(4)#4        | 2.145(2)  | B(3)-O(8)        | 1.396(5) |
| B(1)-O(1)           | 1.358(4)  | B(4)-O(6)        | 1.370(5) |
| B(1)-O(2)           | 1.396(5)  | B(4)-O(7)        | 1.347(5) |
| B(1)-O(3)           | 1.347(5)  | B(4)-O(9)        | 1.374(5) |
| B(2)-O(2)           | 1.468(4)  | B(5)#5-O(7)      | 1.361(5) |
| B(2)#2-O(3)         | 1.446(5)  | B(5)-O(8)        | 1.365(5) |
| B(2)-O(4)           | 1.491(5)  | B(5)-O(9)        | 1.360(5) |
| O(1)-Sb(1)-O(2)#2   | 80.93(10) | O(3)#6-B(2)-O(4) | 109.0(3) |
| O(1)-Sb(1)-O(4)#3   | 95.56(10) | O(3)#6-B(2)-O(5) | 112.1(3) |
| O(1)-Sb(1)-O(4)#4   | 84.39(10) | O(5)-B(2)-O(4)   | 101.3(3) |
| O(4)#3-Sb(1)-O(2)#2 | 81.77(9)  | O(5)-B(3)-O(6)   | 122.9(4) |
| O(4)#4-Sb(1)-O(2)#2 | 148.61(8) | O(5)-B(3)-O(8)   | 117.8(4) |
| O(4)#3-Sb(1)-O(4)#4 | 72.20(11) | O(6)-B(3)-O(8)   | 119.3(3) |
| O(1)-B(1)-O(2)      | 112.6(3)  | O(6)-B(4)-O(9)   | 119.7(4) |
| O(2)-B(2)-O(4)      | 112.2(3)  | O(7)-B(4)-O(6)   | 118.7(4) |
| O(2)-B(2)-O(5)      | 109.4(3)  | O(7)-B(4)-O(9)   | 121.6(4) |
| O(3)-B(1)-O(1)      | 126.3(3)  | O(7)#8-B(5)-O(8) | 122.8(4) |
| O(3)-B(1)-O(2)      | 121.0(3)  | O(9)-B(5)-O(7)#8 | 116.4(3) |
| O(3)#6-B(2)-O(2)    | 112.3(3)  | O(9)-B(5)-O(8)   | 120.8(4) |

Symmetry transformations used to generate equivalent atoms:

#1 -x,-y,-z+3

#2 x-1,y,z

#3 -x,-y,-z+2

#4 x,y,z+1

#5 x+1,-y-1/2,z+1/2

#6 x+1,y,z

#7 x,y,z-1

#8 x-1,-y-1/2,z-1/2

**Table S4.** The antimony borates.

|           | Formula                                          | Space group                  | Band gap (eV) |             | Sb-O framework                                    | Ref. |
|-----------|--------------------------------------------------|------------------------------|---------------|-------------|---------------------------------------------------|------|
|           |                                                  |                              | <i>Cal.</i>   | <i>Exp.</i> |                                                   |      |
| Sb<br>III | SbB <sub>5</sub> O <sub>9</sub> *                | <i>P2<sub>1</sub>/c</i>      | 4.10          | 4.66        | Dimeric [Sb <sub>2</sub> O <sub>6</sub> ] cluster |      |
|           | SbB <sub>3</sub> O <sub>6</sub>                  | <i>Cc</i>                    | 4.08          | 3.95        | Isolated SbO <sub>4</sub>                         | 1    |
|           | Na <sub>2</sub> SbB <sub>3</sub> O <sub>8</sub>  | <i>P2<sub>1</sub>/c</i>      | 4.22          | 3.89        | Isolated SbO <sub>6</sub>                         | 2    |
|           | K <sub>2</sub> SbB <sub>3</sub> O <sub>8</sub>   | <i>P2<sub>1</sub>/c</i>      | 4.18          | 3.69        | Isolated SbO <sub>6</sub>                         | 2    |
|           | Rb <sub>2</sub> SbB <sub>3</sub> O <sub>8</sub>  | <i>P2<sub>1</sub>/c</i>      | 4.21          | 4.82        | Isolated SbO <sub>6</sub>                         | 2    |
|           | KSbB <sub>2</sub> O <sub>6</sub>                 | <i>Cc</i>                    | 3.61          | 3.63        | Corner-sharing SbO <sub>6</sub>                   | 3    |
|           | BaSb <sub>2</sub> B <sub>4</sub> O <sub>12</sub> | <i>C2/c</i>                  | 3.94          | 4.26        | Corner-sharing SbO <sub>6</sub>                   | 3    |
|           | SmSb <sub>2</sub> BO <sub>8</sub>                | <i>Pnma</i>                  | /             | 3.54        | Corner-sharing SbO <sub>6</sub>                   | 4    |
|           | EuSb <sub>2</sub> BO <sub>8</sub>                | <i>Pnma</i>                  | /             | 3.46        | Corner-sharing SbO <sub>6</sub>                   | 4    |
|           | GdSb <sub>2</sub> BO <sub>8</sub>                | <i>Pnma</i>                  | /             | 3.48        | Corner-sharing SbO <sub>6</sub>                   | 4    |
| Sb<br>V   | TbSb <sub>2</sub> BO <sub>8</sub>                | <i>Pnma</i>                  | /             | 3.53        | Corner-sharing SbO <sub>6</sub>                   | 4    |
|           | $\beta$ -RbSbB <sub>2</sub> O <sub>6</sub>       | <i>Cc</i>                    | 3.639         | /           | Corner-sharing SbO <sub>6</sub>                   | 2    |
|           | K <sub>3</sub> Sb <sub>4</sub> BO <sub>13</sub>  | <i>P<math>\bar{1}</math></i> | /             | /           | Corner-sharing SbO <sub>6</sub>                   | 5    |

\* represents the work

*Note:* the above compounds are all derived from the Inorganic Crystal Structure Database (ICSD), and the antimony inorganic borates except for disorder and obvious errors are listed in the statistical data.

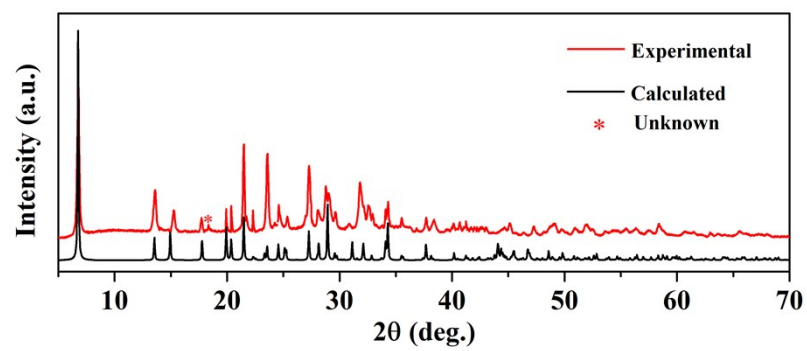

**Figure S1.** Experimental and calculated XRD patterns of  $\text{SbB}_5\text{O}_9$ .

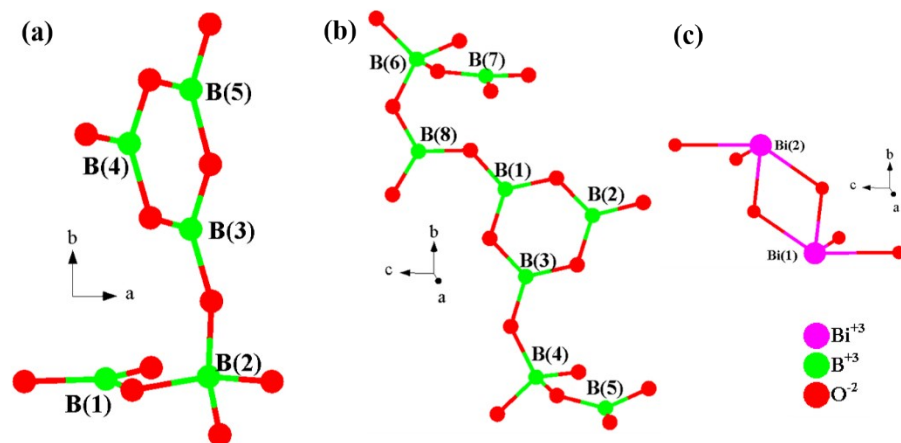

**Figure S2.** The fundamental building block (a)  $[B_5O_{11}]$  of  $SbB_5O_9$  and (b)  $[B_8O_{18}]$  of  $Bi_2B_8O_{15}$ ; (c) The  $[Bi_2O_6]$  dimeric cluster.

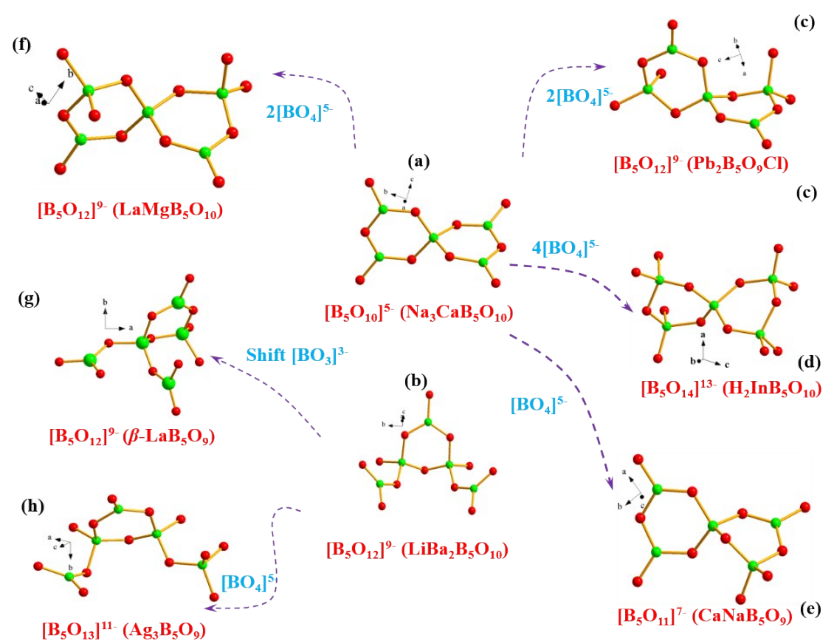

**Figure S3.** The fundamental building blocks  $[B_5O_n]$  ( $n=10, 11, 12, 13, 14$ ) from different borates.



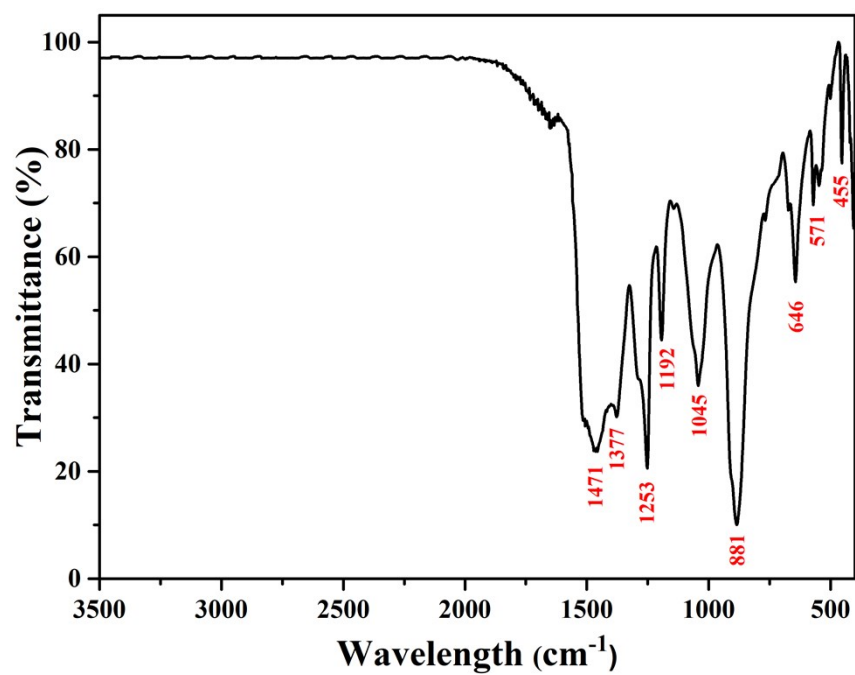

Figure S4. The IR spectrum of SbB<sub>5</sub>O<sub>9</sub>.

## REFERENCES

- (1) Y. C. Liu, X. M. Liu, S. Liu, Q. R. Ding, Y. Q. Li, L. N. Li, S. G. Zhao, Z. S. Lin, J. H. Luo and M. C. Hong, An unprecedented antimony(III) borate with strong linear and nonlinear optical Responses, *Angew. Chem. Int. Ed.*, 2020, **59**, 7793-7796.
- (2) D. Yan, C. L. Hu and J. G. Mao,  $A_2SbB_3O_8$  (A = Na, K, Rb) and  $\beta$ -RbSbB<sub>2</sub>O<sub>6</sub>: two types of alkali boroantimonates with 3D anionic architectures composed of SbO<sub>6</sub> octahedra and borate groups, *CrystEngComm*, 2016, **18**, 1655-1664.
- (3) C. Huang, J. H. Zhang, C. L. Hu, X. Xu, F. Kong and J. G. Mao, K<sub>2</sub>SbB<sub>2</sub>O<sub>6</sub> and BaSb<sub>2</sub>B<sub>4</sub>O<sub>12</sub>: novel boroantimonates with 3D anionic architectures composed of 1D Chains of SbO<sub>6</sub> octahedra and B<sub>2</sub>O<sub>5</sub> groups, *Inorg. Chem.*, 2014, **53**, 3847-3853.
- (4) D. Yan, F. F. Mao and J. G. Mao, LnBSb<sub>2</sub>O<sub>8</sub> (Ln= Sm, Eu, Gd, Tb): a series of lanthanide boroantimonates with unusual 3D anionic structures, *Inorg. Chem.*, 2016, **55**, 10558-10566.
- (5) M. M. Ftini, A. Haddad and T. Jouini, Synthesis and crystal structure of K<sub>3</sub>Sb<sub>4</sub>BO<sub>13</sub>, *J. Chem. Crystallogr.*, 2000, **1**, 30-35.
